# Supplementary material for: The nearby atomic environment effect on an Fe–N–C catalyst for the oxygen reduction reaction: a density functional theory-based study
Source: Royal Society of Chemistry journal article supplement (doi:10.1039/d3cp05156k), 2024-01-01
Supplement: d3cp05156k1.pdf [file d3cp05156k1.pdf]

Supporting Information

The Nearby Atomic Environment Effect on Fe-N-C Catalyst for  
Oxygen Reduction Reaction Studied by Density Functional Theory

Pengfei Yuan,<sup>a,\*</sup> Chong Li,<sup>b</sup> Jianan Zhang,<sup>c</sup> Fei Wang,<sup>b</sup> Juanjuan Wang,<sup>d</sup> Xuebo Chen<sup>a,d,\*</sup>

<sup>a</sup>Shandong Laboratory of Yantai Advanced Materials and Green Manufacturing,  
Yantai 265503, China

<sup>b</sup>International Joint Research Laboratory for Quantum Functional Materials of  
Henan Province, and School of Physics and Microelectronics, Zhengzhou  
University, Zhengzhou 450001, China

<sup>c</sup>College of Materials Science and Engineering, Zhengzhou University, Zhengzhou  
450001, China

<sup>d</sup>Department of Chemistry, Beijing Normal University, Xin-wai-da-jie No. 19,  
Beijing 100875, China

\*Corresponding author: pfyuan@amgm.ac.cn; xuebochen@bnu.edu.cn

## Constant-Potential Calculations

The electric potential of electrochemical interface is changed by adjusting the work function. It could be calculated by:

$$U = (W_f - 4.60) + 0.0592 \times \text{pH} \quad (\text{S1})$$

where  $U$  is electrode potential referenced to SHE,  $W_f$  is the work function and 4.60 is the work function of  $\text{H}_2/\text{H}^+$  at standard conditions.<sup>1-3</sup> The work function could be controlled by adjusting the numbers of charges. When electrode potential at a fixed potential on the RHE scale, electric potential referenced to SHE scale is also changed by changing the pH values. It was given by:

$$U_{\text{RHE}} = U_{\text{SHE}} + 0.0592 \times \text{pH} \quad (\text{S2})$$

According to Neurock methods,<sup>4</sup> the potential-dependent energy can be calculated by:

$$E_{\text{free}}(U) = E_{\text{DFT}} + \int_{-q}^q \langle \overline{V_{\text{tot}}} \rangle dQ + q W_f \quad (\text{S3})$$

The electrode potential ( $U$ ) and energy ( $E$ ) can be fitted to a function of quadratic form, and this quadratic form is consistent with a capacitor created by charged-slab and background-charge system, which could be written as:

$$E(U) = -\frac{1}{2} C (U - U_{\text{PZC}})^2 + E_0 \quad (\text{S4})$$

(1) Duan, Z.; Henkelman, G. Theoretical Resolution of the Exceptional Oxygen Reduction Activity of Au (100) in Alkaline Media. *ACS Catal.* 2019, 9, 5567–5573.

(2) Duan, Z.; Henkelman, G. Identification of Active Sites of Pure and Nitrogen-

Doped Carbon Materials for Oxygen Reduction Reaction Using Constant-Potential Calculations. *J. Phys. Chem. C* 2020, 124, 12016–12023.

(3) Duan, Z.; Henkelman, G. Surface Charge and Electrostatic Spin Crossover Effects in CoN<sub>4</sub> Electrocatalysts. *ACS Catal.* 2020, 10, 12148–12155.

(4) Filhol, J. S.; Neurock, M. Elucidation of the Electrochemical Activation of Water Over Pd by First Principles. *Angew. Chem. Int. Ed.* 2006, 118, 416–420.

## Microkinetic Simulations

Following the kinetic model developed by Hansen et al. <sup>(1)</sup>, we simulated the polarization curves of str-11. Here, we only consider the dominating associative mechanism pathway. The O<sub>2</sub> molecule diffusion, adsorption, and electrochemical reduction steps are listed by the following equations:

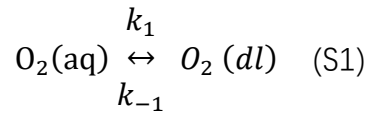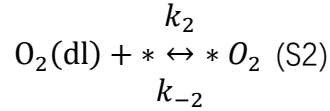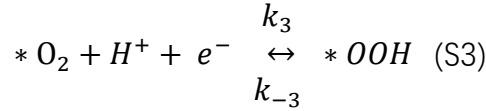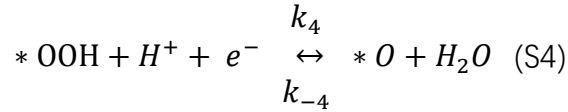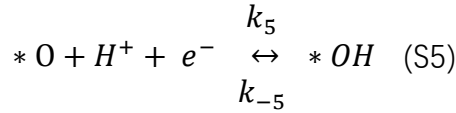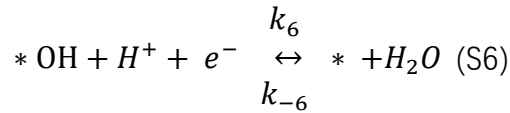

Where  $k_i$  and  $k_{-i}$  are the rate constants of reaction and reverse reaction, O<sub>2</sub> (aq) and O<sub>2</sub> (dl) represent O<sub>2</sub> in the electrolyte and catalyst-electrolyte interface, respectively. Based on steady-state approximations, the ORR dynamical coverage rate of str-11, O<sub>2</sub> (dl), O<sub>2</sub>\*, OOH\*, O\* and OH\* could be written as:

$$\frac{\partial \theta_{O_2(\text{dl})}}{\partial t} = k_1 X_{O_2} - k_{-1} \theta_{O_2(\text{dl})} - k_2 \theta_{O_2(\text{dl})} \theta_* + k_{-2} X_{*O_2} \quad (\text{S7})$$

$$\frac{\partial \theta_*}{\partial t} = k_6 \theta_{*OH} - k_{-6} X_{H_2O} \theta_* - k_2 \theta_{O_2(\text{dl})} \theta_* + k_{-2} X_{*O_2} \quad (\text{S8})$$

$$\frac{\partial \theta_{*O_2}}{\partial t} = -k_3 \theta_{*O_2} + k_{-3} \theta_{*OOH} + k_2 \theta_{O_2(\text{dl})} \theta_* - k_{-2} \theta_{*O_2} \quad (\text{S9})$$

$$\frac{\partial \theta_{*OOH}}{\partial t} = -k_4 \theta_{*OOH} + k_{-4} \theta_{*O} X_{H_2O} + k_3 \theta_{*O_2} - k_{-3} \theta_{*OOH} \quad (S10)$$

$$\frac{\partial \theta_{*O}}{\partial t} = -k_5 \theta_{*O} + k_{-5} \theta_{*OH} + k_4 \theta_{*OOH} - k_{-4} \theta_{*O} X_{H_2O} \quad (S11)$$

$$\frac{\partial \theta_{*OH}}{\partial t} = -k_6 \theta_{*OH} + k_{-6} \theta_{*O} X_{H_2O} + k_5 \theta_{*O} - k_{-5} \theta_{*OH} \quad (S12)$$

Where  $\theta$  is defined as the coverage of the intermediate species,  $t$  is the reaction time. The coverage of each species should satisfy the relationship:

$$\theta_* + \theta_{*O_2} + \theta_{*O} + \theta_{*OOH} + \theta_{*OH} = 1 \quad (S13)$$

The value of  $X_{H_2O}$  was taken as 1, and  $X_{O_2}$  was taken as  $2.34 \times 10^{-5}$ , representing  $O_2$  (g) in equilibrium with  $O_2$  (aq) at 1 atm.<sup>(1)</sup> For non-electrochemical reaction steps, the equilibrium constant ( $K_i$ ) can be expressed as:

$$K_i = \exp\left(-\frac{\Delta G_i}{K_b T}\right) \quad (S14)$$

While for electrochemical steps, the rate constant is calculated by:

$$k_i = \exp\left(-\frac{e(U-U_i)}{K_b T}\right) \quad (S15)$$

Where  $U_i$  is the reversible potential of electrochemical step, and  $k_i$  is written as:

$$k_i = A_i \exp\left(-\frac{E_{a,i}}{K_b T}\right) \exp\left(-\frac{e\beta_i(U-U_i)}{K_b T}\right) \quad (S16)$$

The pre-factor  $A_i$  is set to  $1 \times 10^9$ , the temperature is set to be 300 K and the  $\beta_i$  is 0.5. Since the  $E_{a,i}$  of electrochemical ORR steps are generally small, we adopted to 0.26 eV to represent the proton transfer energy barrier, and this approach has been adopted by many theoretical studies.<sup>(2-5)</sup> These rate equations are solved at steady state.

(1) Hansen, H. A.; Viswanathan, V.; Nørskov, J. K. Unifying Kinetic and

Thermodynamic Analysis of 2e<sup>-</sup> and 4e<sup>-</sup> Reduction of Oxygen on Metal Surfaces.

J. Phys. Chem C 2014, 118, 6706–6718.

(2) Tripkovic, V.; Skulason, E.; Siahrostami, S.; Nørskov, J. K.; Rossmeisl, J. The Oxygen Reduction Reaction Mechanism on Pt (111) from Density Functional Theory Calculations. J. Electrochim. Acta 2010, 55, 79757981.

(3) Li, Y.; Zhang, S.; Yu, J.; Wang, Q.; Sun, Q.; Jena, P. A new C = C embedded porphyrin sheet with superior oxygen reduction performance. Nano Res. 2015, 8, 2901–2912.

(4) Rebarchik, M.; Bhandari, S.; Kropp, T.; Mavrikakis, M. How Noninnocent Spectator Species Improve the Oxygen Reduction Activity of Single-Atom Catalysts: Microkinetic Models from First-Principles Calculations. ACS Catal. 2020, 10, 9129–9135.

(5) Huang, X.; Gan, L.-Y.; Wang, J.; Ali, S.; He, C.-C.; Xu, H. Developing Proton-Conductive Metal Coordination Polymer as Highly Efficient Electrocatalyst toward Oxygen Reduction. J. Phys. Chem. Lett. 2021, 12, 9197–9204.

Table S1. The calculated total energy (eV) and corresponding ZPE-TS (eV) used in the Gibbs free energy calculations.

|                  | Total energy | ZPE-TS (T=300K) | Free energy (eV) |
|------------------|--------------|-----------------|------------------|
| H <sub>2</sub> O | -14.2244     | -0.0662         | -14.2906         |
| H <sub>2</sub>   | -6.75924     | -0.1335         | -6.89276         |
| OH <sup>-</sup>  |              |                 | -10.8442         |
| *OOH             |              | 0.2215          |                  |
| *O               |              | -0.0145         |                  |
| *OH              |              | 0.2588          |                  |

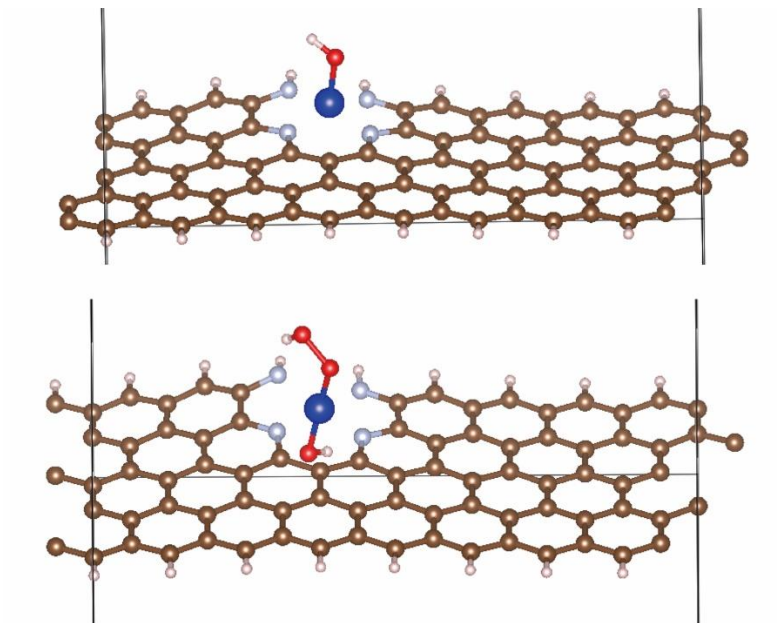

Figure S1. The structure of OH ligand modified zig-zag-hosted Fe-N<sub>4</sub>, and with OOH adsorption. The two structures are drawn by the data in reference below, which is Ref. 3 in the main text.

Hoon, T. C.; David, A. C.; Drew, H.; Brian, T. S.; Edward, F. H.; Karren, L. M.; Piotr, Z. Direct atomic-level insight into the active sites of a high-performance PGM-free ORR catalyst. *Science* 2017, 357, 479-484.



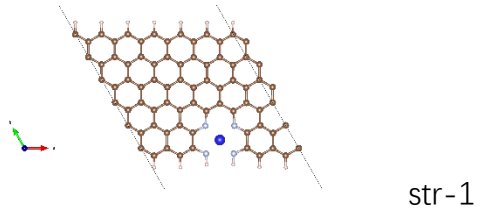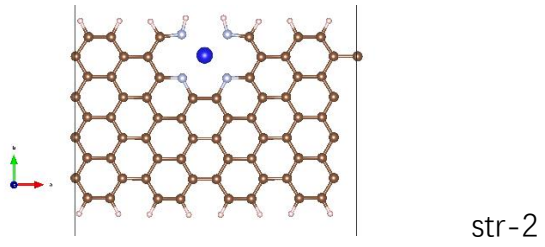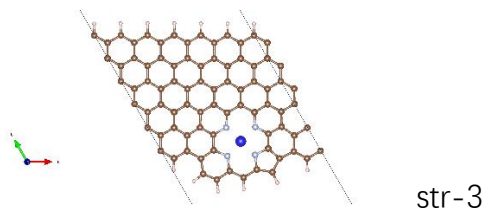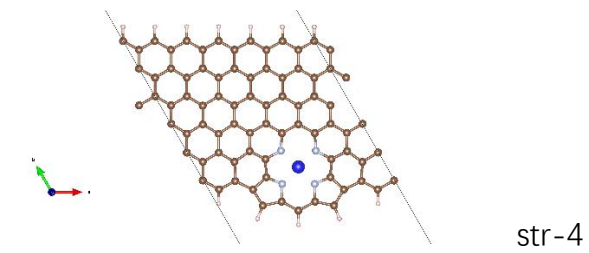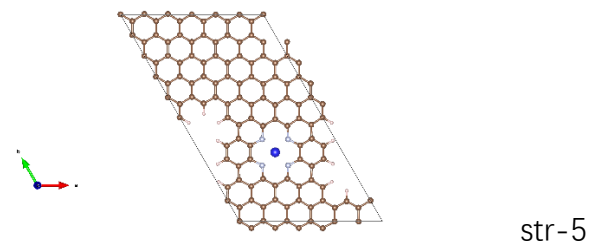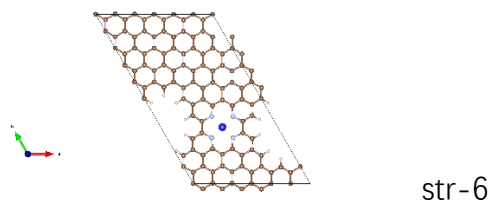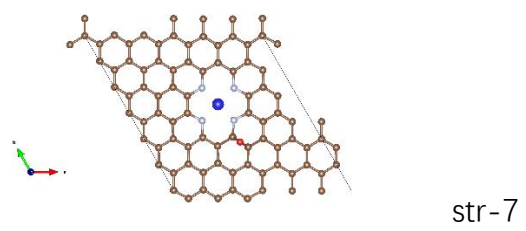

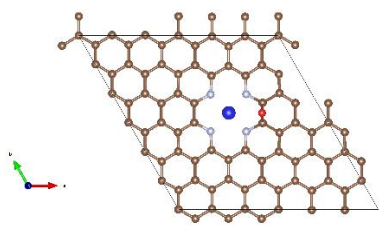

str-8

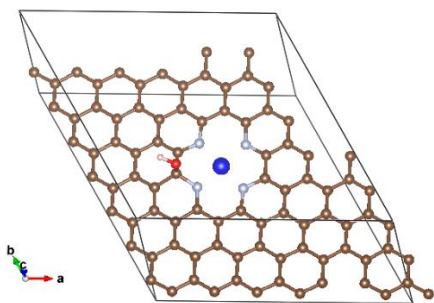

str-9

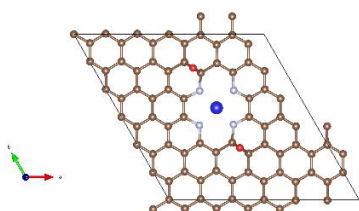

str-10

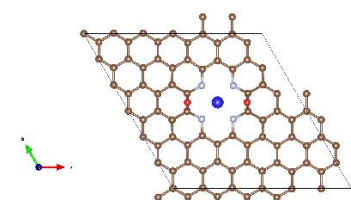

str-11

Figure S2. The original figure of structures used in this manuscript: str-1 to str-11.

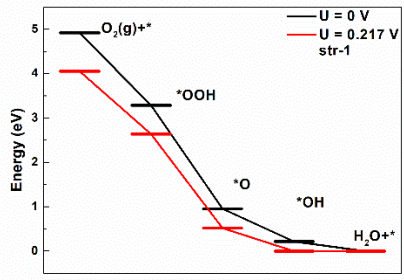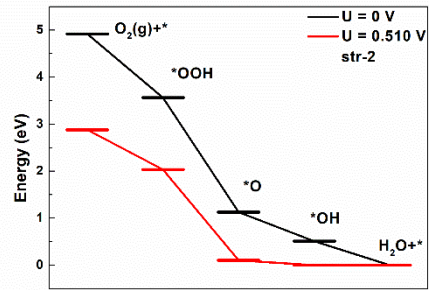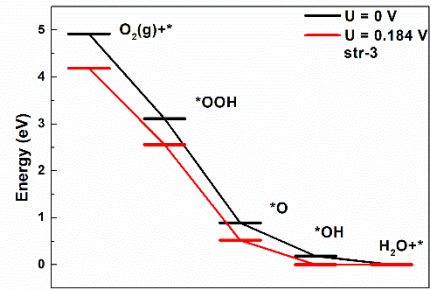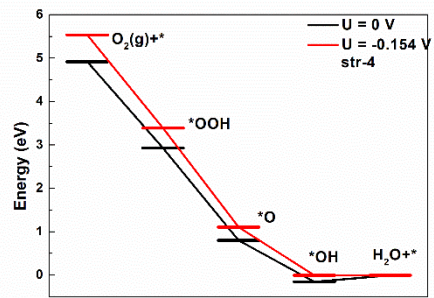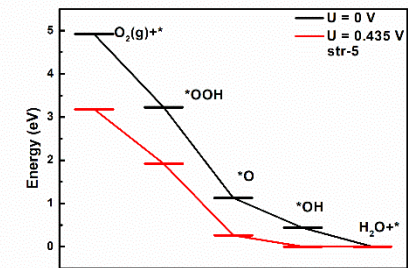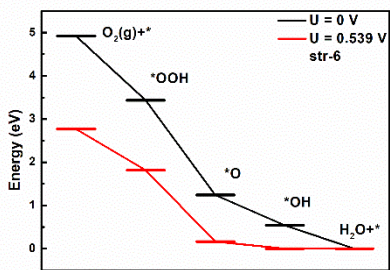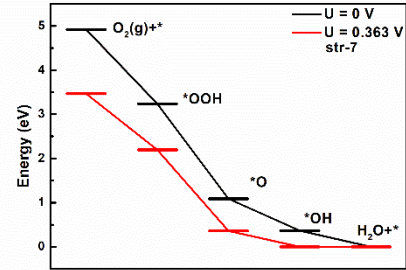

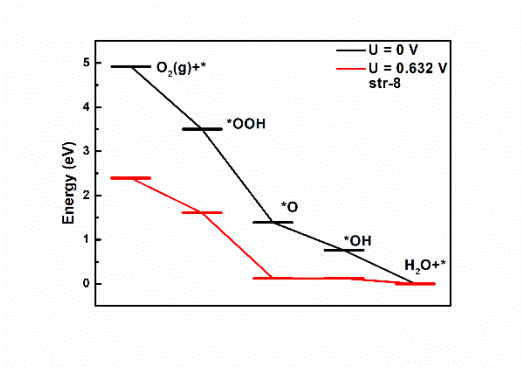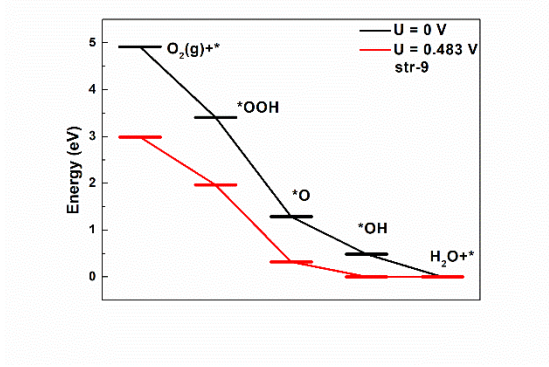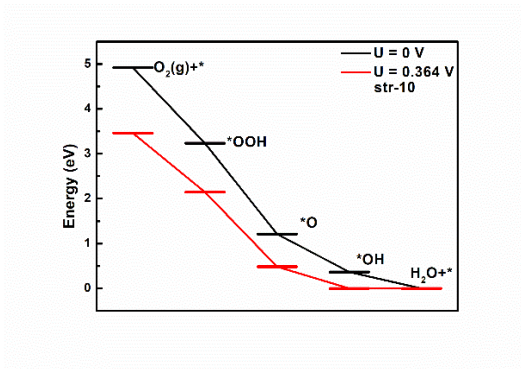

Figure S3. The calculated reaction Gibbs free energy for str-1 to str-10.

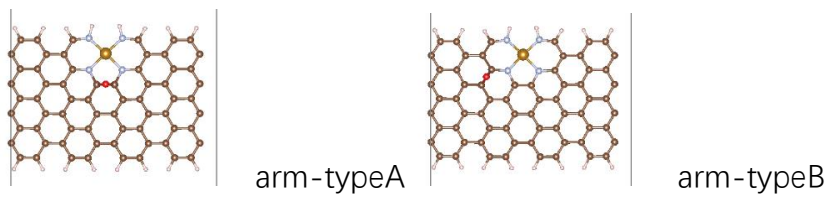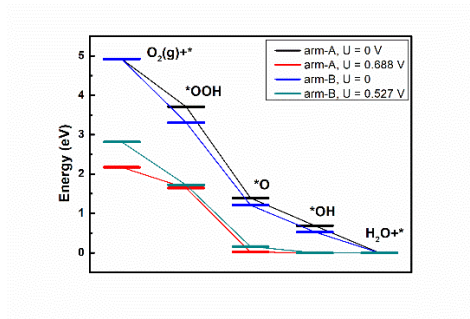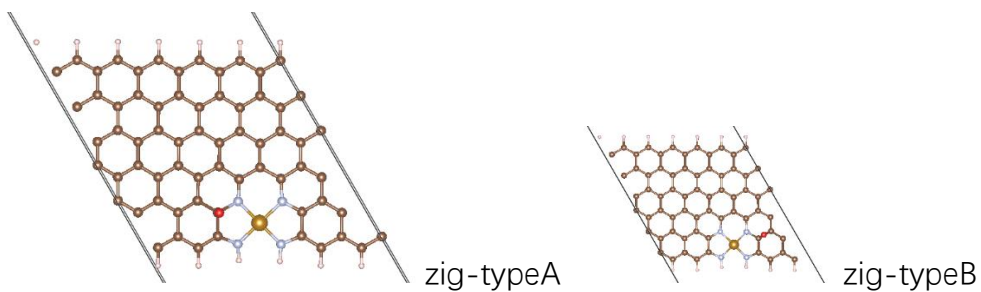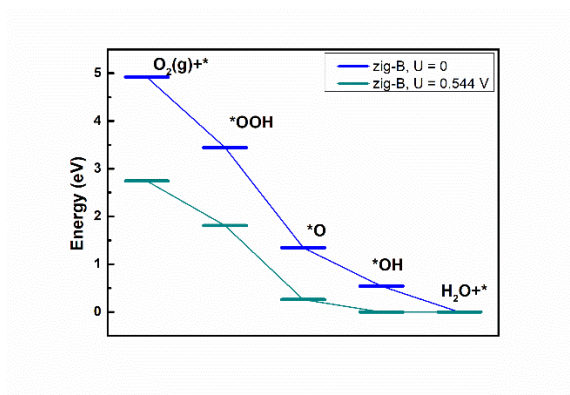

Figure S4. The structure of O adsorbed on str-1 and str-2 with type A and type B carbon atoms. The calculated reaction Gibbs free energy on these structures.

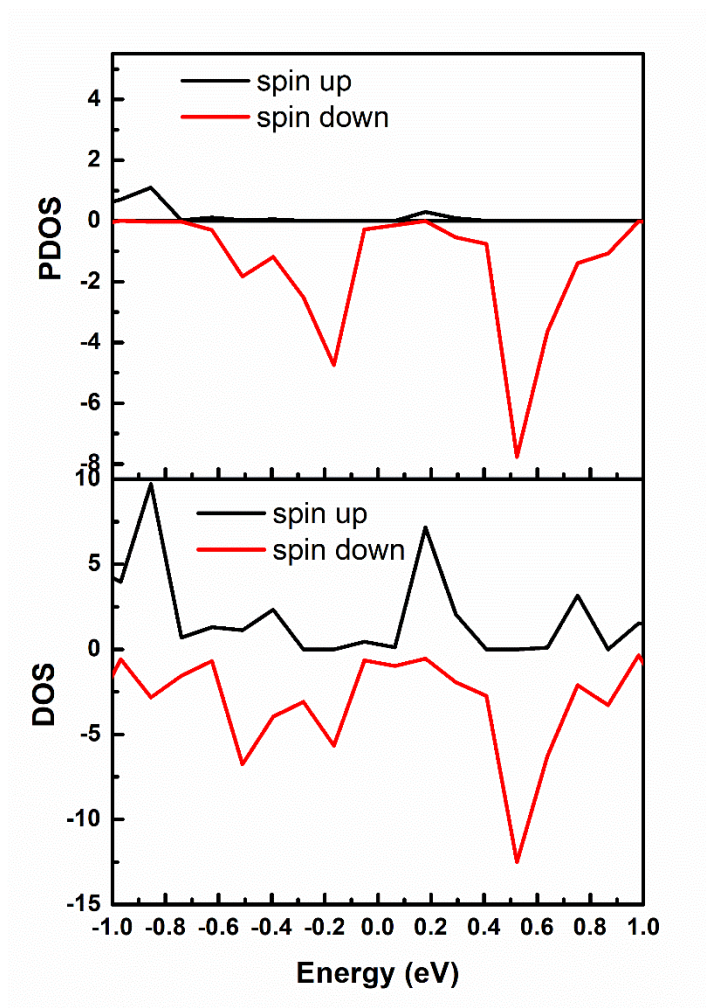

Figure S5. The calculated total DOS and PDOS of Fe of str-11. Fermi level is set to zero.

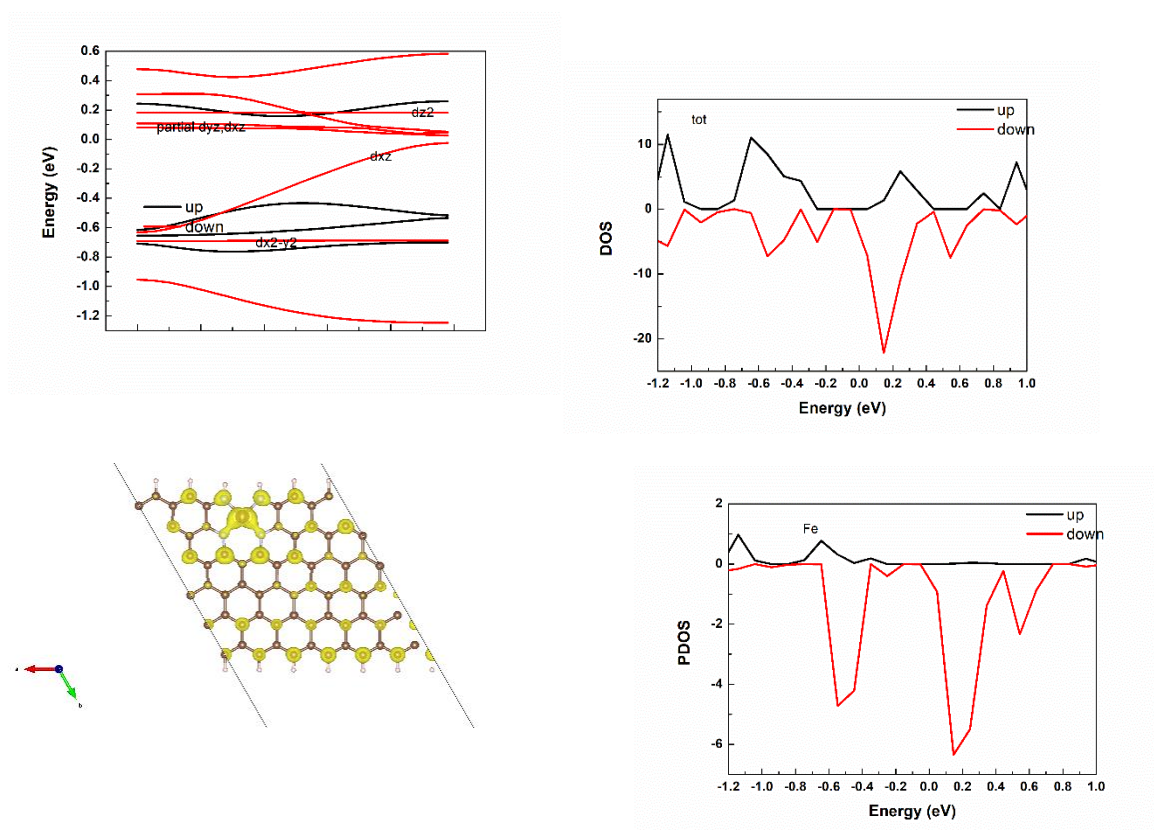

Figure S6. The calculated band structure, partial charge density, total density of states (DOS) and the partial DOS (PDOS) of Fe atom in str-1. Fermi level is set to zero.

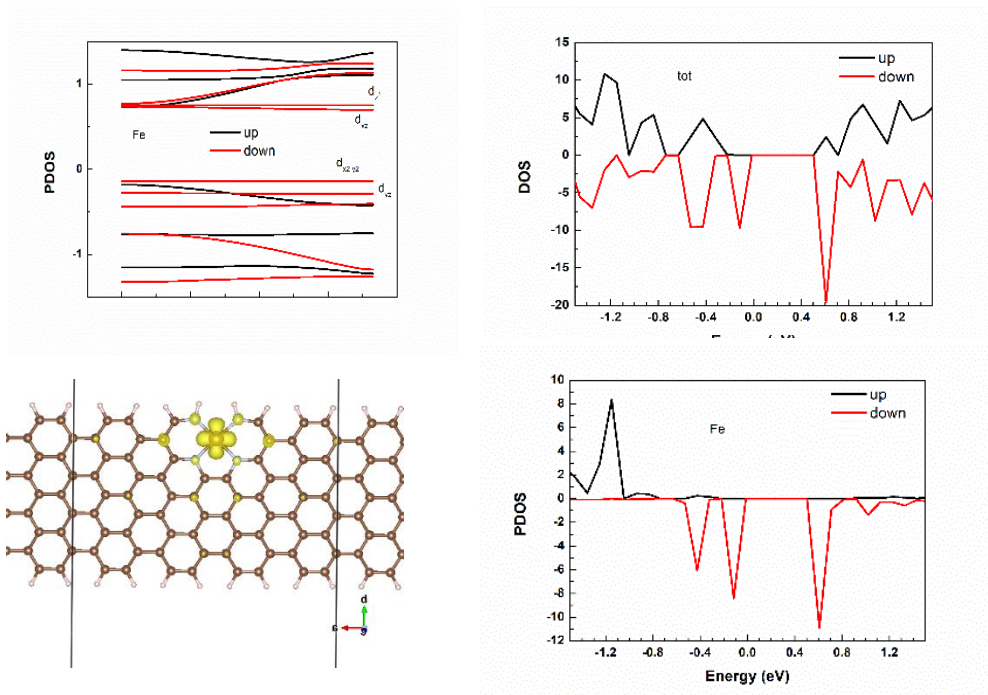

Figure S7. The calculated band structure, partial charge density, total density of states (DOS) and the partial DOS (PDOS) of Fe atom in str-2. Fermi level is set to zero.



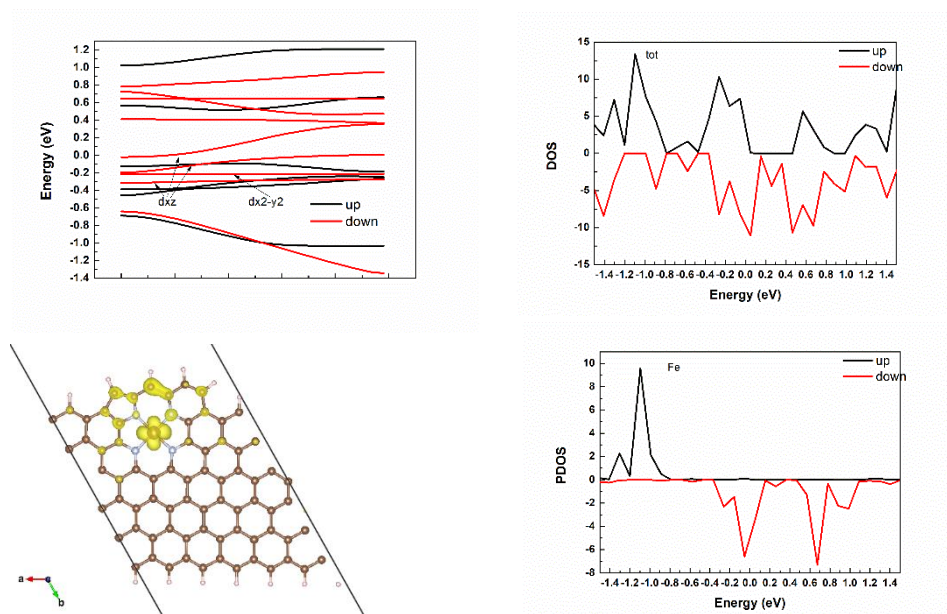

Figure S8. The calculated band structure, partial charge density, total density of states (DOS) and the partial DOS (PDOS) of Fe atom in str-3. Fermi level is set to zero.

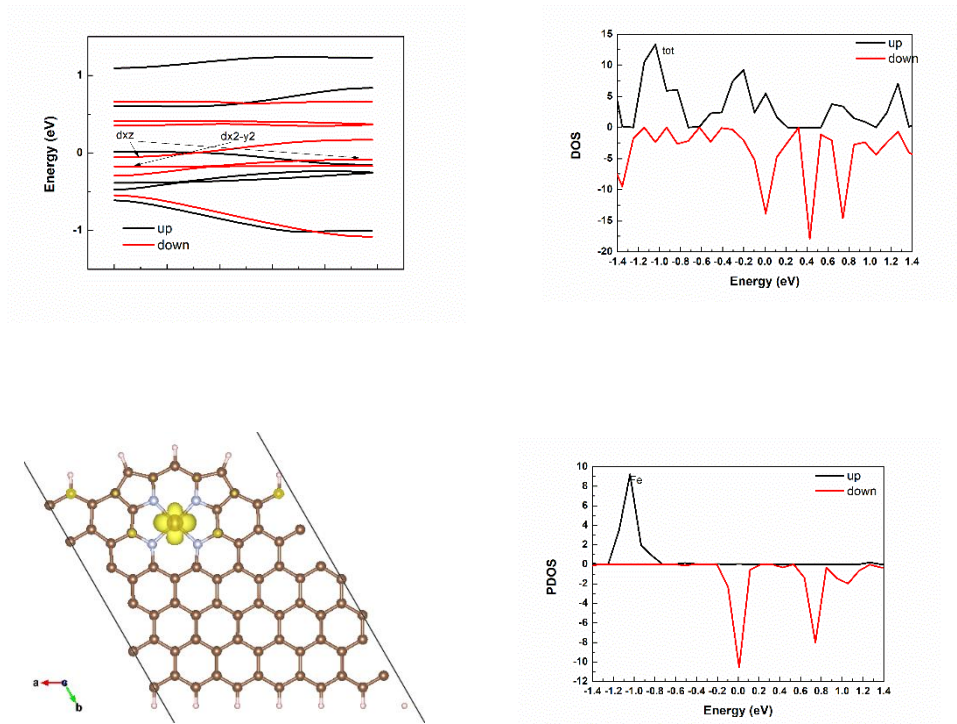

Figure S9. The calculated band structure, partial charge density, total density of states (DOS) and the partial DOS (PDOS) of Fe atom in str-4. Fermi level is set to zero.

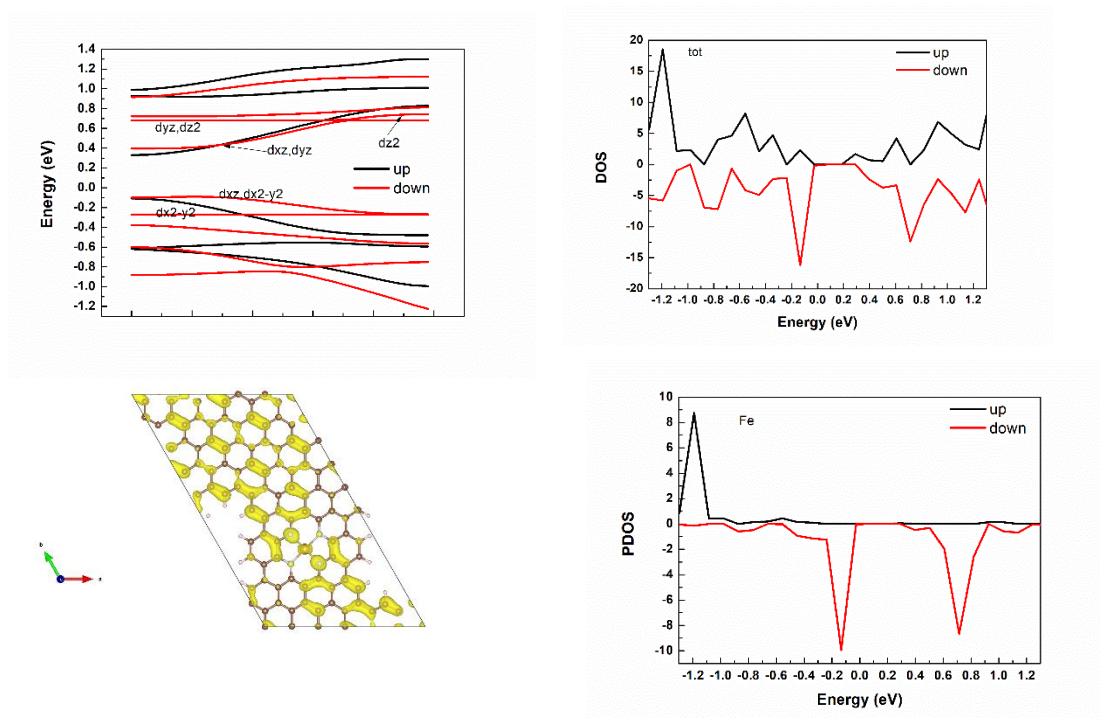

Figure S10. The calculated band structure, partial charge density, total density of states (DOS) and the partial DOS (PDOS) of Fe atom in str-5. Fermi level is set to zero.

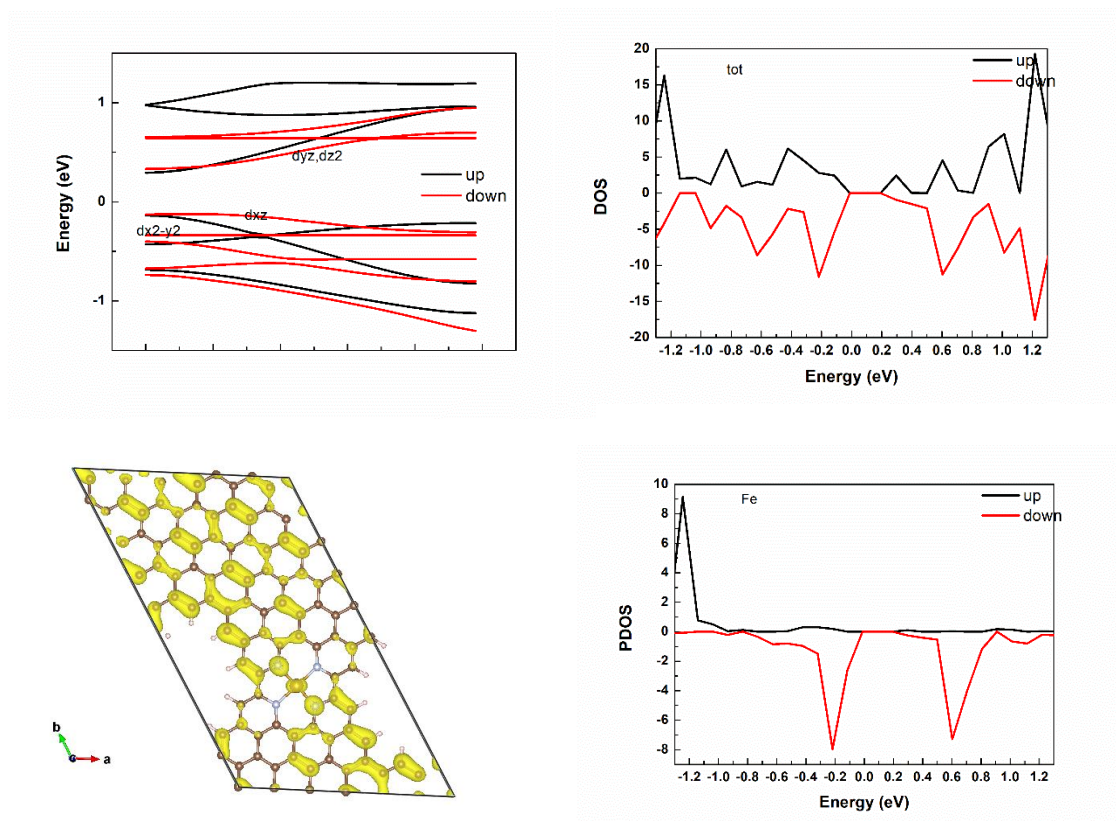

Figure S11. The calculated band structure, partial charge density, total density of states (DOS) and the partial DOS (PDOS) of Fe atom in str-6. Fermi level is set to zero. Fermi level is set to zero.

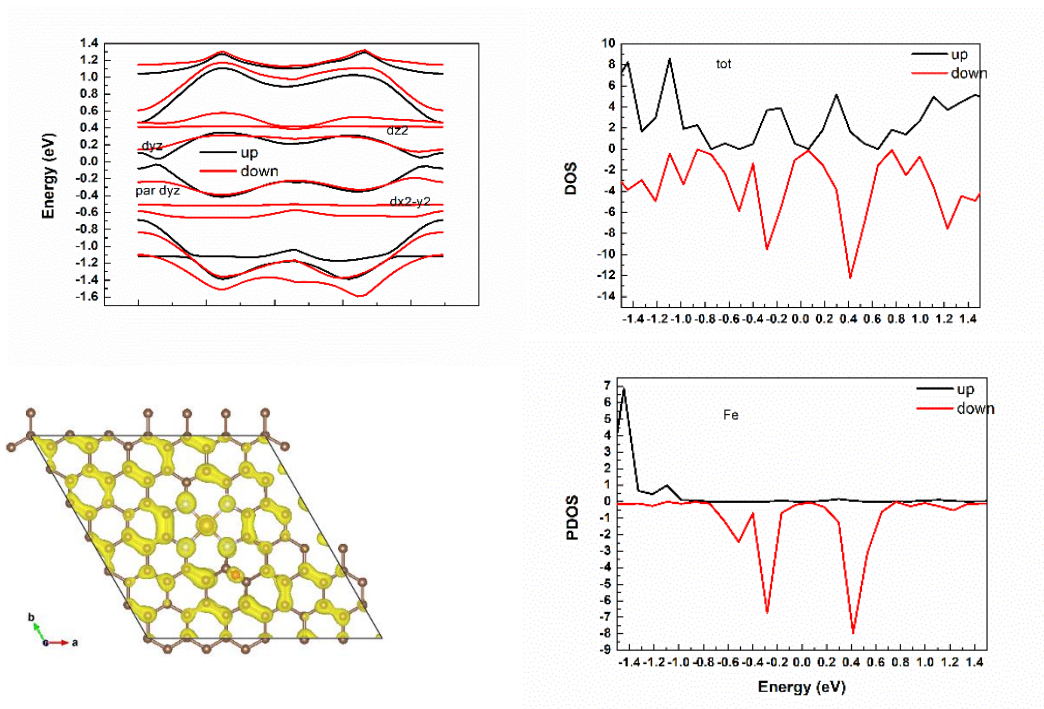

Figure S12. The calculated band structure, partial charge density, total density of states (DOS) and the partial DOS (PDOS) of Fe atom in str-7. Fermi level is set to zero.

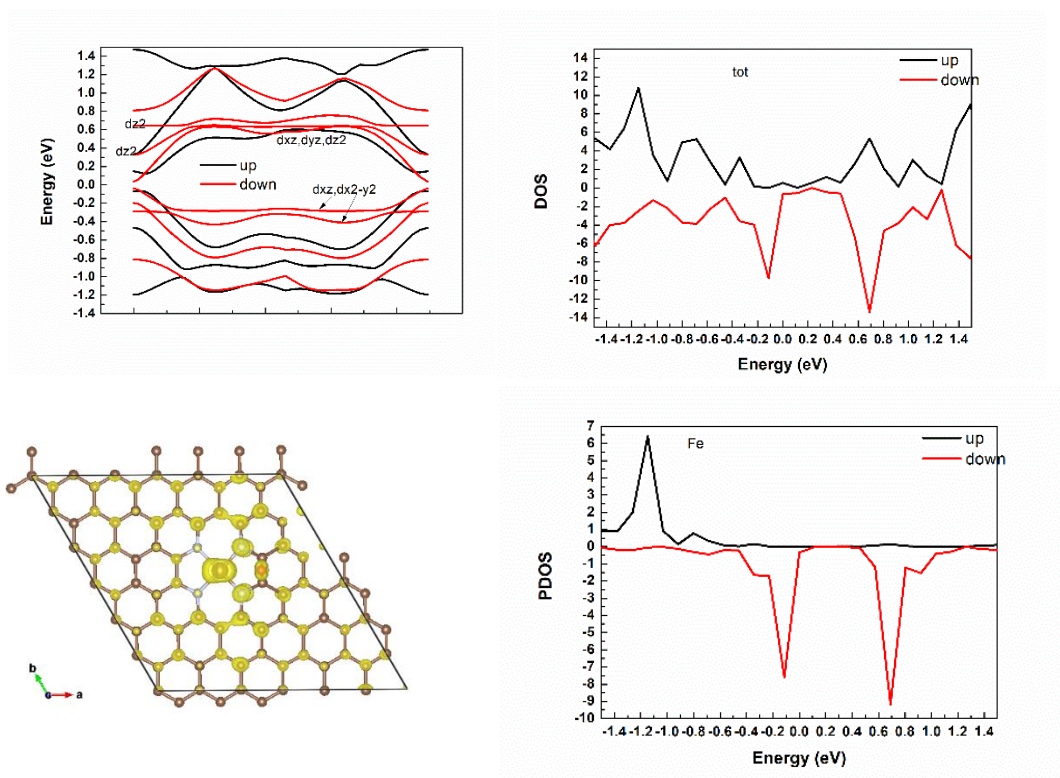

Figure S13. The calculated band structure, partial charge density, total density of states (DOS) and the partial DOS (PDOS) of Fe atom in str-8. Fermi level is set to zero.

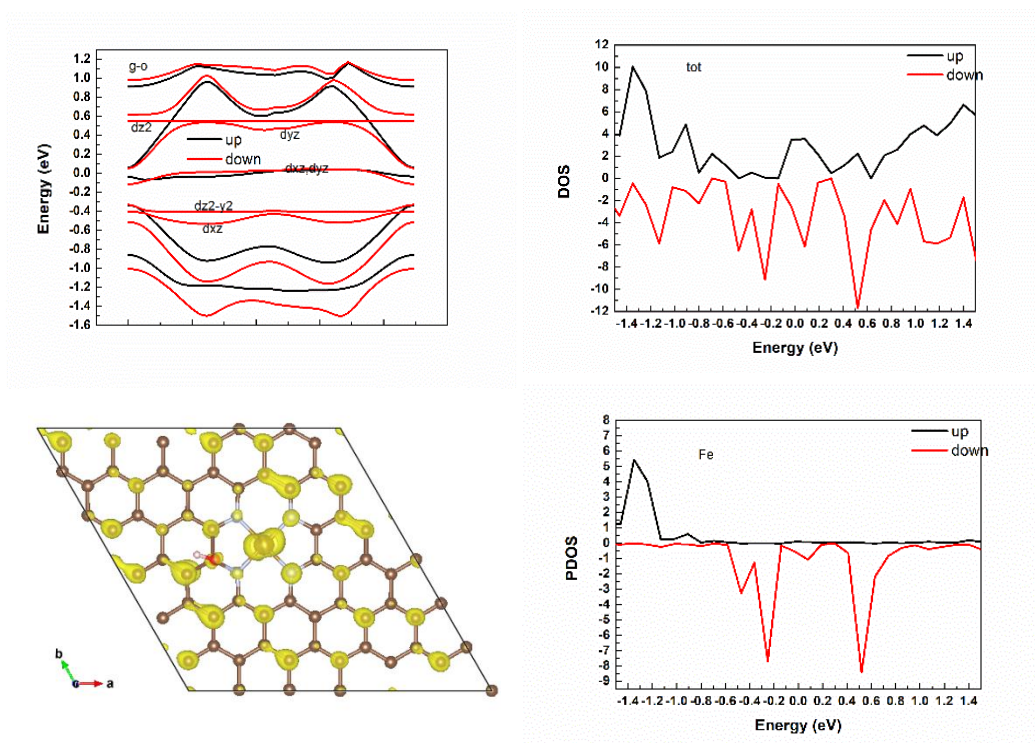

Figure S14. The calculated band structure, partial charge density, total density of states (DOS) and the partial DOS (PDOS) of Fe atom in str-9. Fermi level is set to zero.

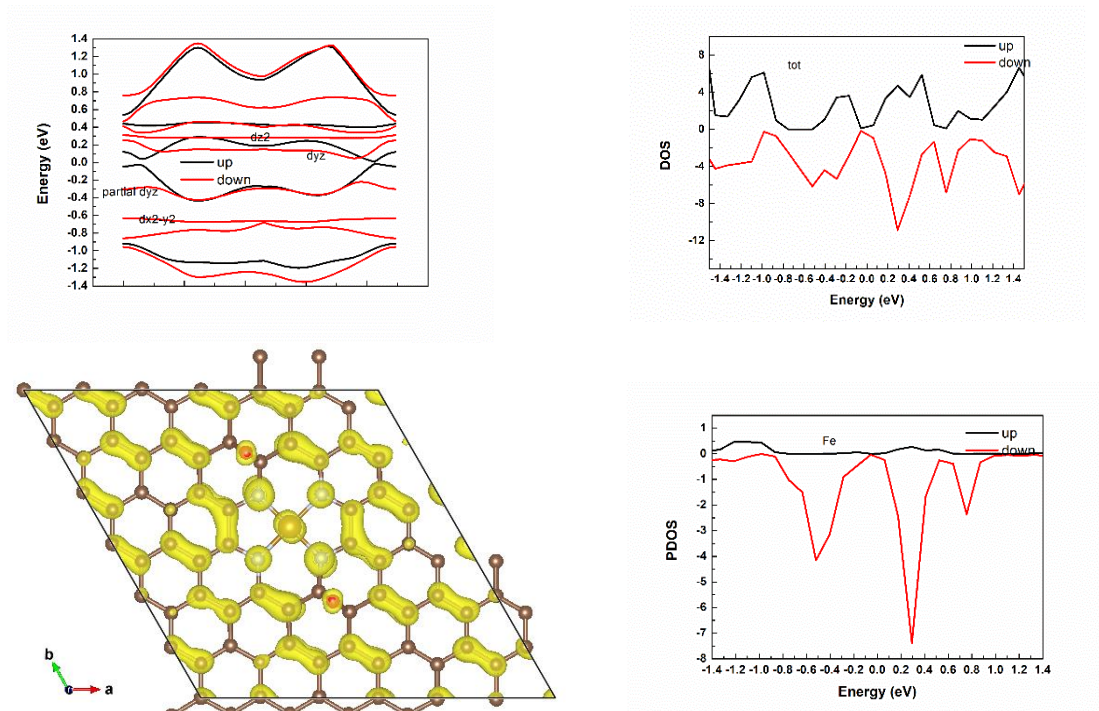

Figure S15. The calculated band structure, partial charge density, total density of states (DOS) and the partial DOS (PDOS) of Fe atom in str-10. Fermi level is set to zero.
